# Supplementary material for: Translation of the eHealth Impact Questionnaire for a Population of Dutch Electronic Health Users: Validation Study
Source: PubMed Central journal article supplement (PMC6732971; doi:10.2196/13408), 2019-08-26
Supplement: jmir_v21i8e13408_app2.pdf [file jmir_v21i8e13408_app2.pdf]

*Multimedia Appendix 2. Structural Validity: Exploratory Factor Analysis factor loadings.*

| <b>Item</b>                               | <b>Factor 1</b> | <b>Factor 2</b> | <b>Factor 3</b> |
|-------------------------------------------|-----------------|-----------------|-----------------|
| <b>A: Study Sample 1 – eHIQ-NL Part 1</b> |                 |                 |                 |
| Part 1 - item 9                           | 0.772*          |                 |                 |
| Part 1 - item 8                           | 0.663*          |                 |                 |
| Part 1 - item 11                          | 0.592*          |                 |                 |
| Part 1 - item 6                           |                 | 0.863*          |                 |
| Part 1 - item 7                           |                 | 0.759*          |                 |
| Part1 - item 10                           |                 | 0.612*          |                 |
| Part 1 - item 4                           |                 |                 | -0.826*         |
| Part 1 - item 5                           |                 |                 | -0.670*         |
| Part 1 - item 3                           |                 |                 | -0.620*         |
| Part 1 - item 1                           |                 |                 | -0.455*         |
| Part 1 - item 2                           |                 | 0.312*          | -0.434*         |
| <b>B: Study Sample 1 – eHIQ-NL Part 2</b> |                 |                 |                 |
| Part 2 - item 23                          | 0.787*          |                 |                 |
| Part 2 - item 22                          | 0.676*          |                 |                 |
| Part 2 - item 7                           | 0.657*          |                 |                 |
| Part 2 - item 21                          | 0.616*          |                 |                 |
| Part 2 - item 20                          | 0.592*          |                 |                 |
| Part 2 - item 18                          | 0.589*          |                 |                 |
| Part 2 - item 1                           | 0.560*          |                 |                 |
| Part 2 - item 13                          | 0.401*          |                 |                 |
| Part 2 - item 9                           |                 | 0.722*          |                 |
| Part 2 - item 6                           |                 | 0.676*          |                 |
| Part 2 - item 3                           |                 | 0.541*          |                 |
| Part 2 - item 5                           |                 | 0.519*          |                 |
| Part 2 - item 26                          |                 | 0.498*          |                 |
| Part 2 - item 12                          |                 | 0.481*          |                 |
| Part 2 - item 24                          |                 | 0.435*          |                 |
| Part 2 - item 2                           |                 | 0.416*          |                 |
| Part 2 - item 25                          |                 | -0.390*         |                 |
| Part 2 - item 15                          |                 |                 | 0.842*          |
| Part 2 - item 14                          |                 |                 | 0.799*          |
| Part 2 - item 19                          |                 |                 | 0.592*          |
| <b>C: Study Sample 2 – eHIQ-NL Part 1</b> |                 |                 |                 |
| Part 1 - item 9                           | -0.453*         |                 |                 |
| Part 1 - item 11                          | -0.432          | 0.351           |                 |

| <b>Item</b>                               | <b>Factor 1</b> | <b>Factor 2</b> | <b>Factor 3</b> |
|-------------------------------------------|-----------------|-----------------|-----------------|
| Part 1 - item 8                           | -0.334          | 0.333           |                 |
| Part 1 - item 7                           |                 | 0.911*          |                 |
| Part 1 - item 6                           |                 | 0.791*          |                 |
| Part 1 - item 10                          | -0.371          | 0.658*          |                 |
| Part 1 - item 4                           |                 |                 | -0.759*         |
| Part 1 - item 3                           |                 |                 | -0.736*         |
| Part 1 - item 2                           |                 | 0.310           | -0.617**        |
| Part 1 - item 1                           |                 |                 | -0.596**        |
| Part 1 - item 5                           |                 |                 | -0.544*         |
| <b>D: Study Sample 3 – eHIQ-NL Part 2</b> |                 |                 |                 |
| Part 2 - item 22                          | 0.745*          |                 |                 |
| Part 2 - item 23                          | 0.669*          |                 |                 |
| Part 2 - item 7                           | 0.517*          |                 |                 |
| Part 2 - item 1                           | 0.505*          | -0.319          |                 |
| Part 2 - item 8                           | 0.505*          |                 |                 |
| Part 2 - item 10                          | 0.455*          | -0.389          |                 |
| Part 2 - item 18                          | 0.415*          |                 |                 |
| Part 2 - item 13                          | 0.355*          |                 |                 |
| Part 2 - item 21                          | 0.204*          |                 |                 |
| Part 2 - item 9                           |                 | -0.849*         |                 |
| Part 2 - item 6                           |                 | -0.847*         |                 |
| Part 2 - item 12                          |                 | -0.693*         |                 |
| Part 2 - item 5                           |                 | -0.631*         |                 |
| Part 2 - item 17                          |                 | -0.613*         |                 |
| Part 2 - item 26                          |                 | 0.583*          |                 |
| Part 2 - item 2                           |                 | -0.598*         |                 |
| Part 2 - item 25                          |                 | 0.583*          |                 |
| Part 2 - item 11                          |                 | -0.495*         |                 |
| Part 2 - item 3                           |                 | 0.447*          |                 |
| Part 2 - item 4                           | 0.392           | -0.431*         |                 |
| Part 2 - item 24                          |                 | -0.420*         |                 |
| Part 2 - item 16                          |                 | -0.402*         |                 |
| Part 2 - item 19                          |                 |                 | 0.916*          |
| Part 2 - item 15                          |                 |                 | 0.790*          |
| Part 2 - item 14                          |                 |                 | 0.639*          |
| Part 2 - item 20                          | 0.463*          |                 | 0.466*          |

*Standardized Factor Loadings. Loadings < .30 suppressed.*
