# Supplementary material for: Translation of the eHealth Impact Questionnaire for a Population of Dutch Electronic Health Users: Validation Study
Source: PubMed Central journal article supplement (PMC6732971; doi:10.2196/13408), 2019-08-26
Supplement: jmir_v21i8e13408_app3.pdf [file jmir_v21i8e13408_app3.pdf]

Multimedia Appendix 3. Internal Consistency.

| Original factor structure                             |       | Modified factor structure                       |       | Modified factor structure problematic items |
|-------------------------------------------------------|-------|-------------------------------------------------|-------|---------------------------------------------|
| Subscale                                              | Omega | Subscale                                        | Omega | Cronbach's Alpha                            |
| <b>A: Study Sample 1 – eHIQ-NL<sup>1</sup> Part 1</b> |       |                                                 |       |                                             |
| <b>Part 1: General attitude</b>                       | 0.84  | <b>Part 1: General attitude</b>                 | 0.90  | 2                                           |
| Attitudes towards online health information           | 0.79  | Attitudes towards online health information     | 0.79  |                                             |
| Attitudes towards sharing health experiences online   | 0.78  | Comfort with sharing health experiences online  | 0.73  |                                             |
|                                                       |       | Usefulness of sharing health experiences online | 0.83  |                                             |
| <b>B: Study Sample 1 – eHIQ-NL Part 2</b>             |       |                                                 |       |                                             |
| <b>Part 2: Specific attitude</b>                      | 0.90  | <b>Part 2: Specific attitude</b>                | 0.89  |                                             |
| Confidence and identification                         | 0.85  | Motivation and confidence to act                | 0.85  |                                             |
| Information and presentation                          | 0.70  | Information and presentation                    | 0.78  |                                             |
| Understanding and motivation                          | 0.81  | Identification                                  | 0.82  |                                             |
| <b>C: Study Sample 2 – eHIQ-NL Part 1</b>             |       |                                                 |       |                                             |
| <b>Part 1: General attitude</b>                       | 0.90  | <b>Part 1: General attitude</b>                 | 0.91  |                                             |
| Attitudes towards online health information           | 0.81  | Attitudes towards online health information     | 0.81  |                                             |
| Attitudes towards sharing health experiences online   | 0.88  | Comfort with sharing health experiences online  | 0.76  |                                             |
|                                                       |       | Usefulness of sharing health experiences online | 0.86  |                                             |
| <b>D: Study Sample 3 – eHIQ-NL Part 2</b>             |       |                                                 |       |                                             |
| <b>Part 2: Specific attitude</b>                      | 0.87  | <b>Part 2: Specific attitude</b>                | 0.89  | 0.91                                        |
| Confidence and identification                         | 0.92  | Motivation and confidence to act                | 0.85  | 0.91                                        |
| Information and presentation                          | 0.65  | Information and presentation                    | 0.70  | 0.91                                        |
| Understanding and motivation                          | 0.83  | Identification                                  | 0.86  | 0.91                                        |

1 eHIQ-NL: Dutch version of the e-Health Impact Questionnaire.

2 Cronbach alpha not applicable when omega could be reliably calculated.
